# Supplementary material
Source: HighWire-hosted journal article supplement (https://bmjopen.bmj.com/content/11/12/e051959)
Supplement: inline-supplementary-material-1 [file inline-supplementary-material-1.pdf]

## Appendix 1: Search Strategy

| No. | Keywords [TIAB]                                                                                                                                                                                                                                                                                                                                                                                                                                                                        | MeSH terms                                                                                                         |
|-----|----------------------------------------------------------------------------------------------------------------------------------------------------------------------------------------------------------------------------------------------------------------------------------------------------------------------------------------------------------------------------------------------------------------------------------------------------------------------------------------|--------------------------------------------------------------------------------------------------------------------|
| 1   | (Basic Life Support <b>OR</b> BLS <b>OR</b> Basic Cardiac Life Support <b>OR</b> Life Support <b>OR</b> Resuscitation <b>OR</b> CPR <b>OR</b> Cardio Pulmonary Resuscitation)<br><br><b>OR</b> (Chest Compressions <b>OR</b> Compressions)<br><br><b>OR</b> (Rescue Breath* <b>OR</b> Mouth-to-mouth <b>OR</b> Expired Air Resuscitation <b>OR</b> Expired Air Ventilation <b>OR</b> EAV)<br><br><b>OR</b> (AED <b>OR</b> (Automated External) Defibrillator <b>OR</b> Defibrillation) | (Cardiopulmonary Resuscitation <b>OR</b> Heart Massage <b>OR</b> Respiration, Artificial <b>OR</b> Defibrillators) |
| 2   | Decay <b>OR</b> Loss <b>OR</b> Degener* <b>OR</b> Deterior* <b>OR</b> Impair* <b>OR</b> Atrophy <b>OR</b> Decline <b>OR</b> Decreas* <b>OR</b> Depreciat* <b>OR</b> Fade <b>OR</b> Fading <b>OR</b> Faded <b>OR</b> Reced* <b>OR</b> Rever* <b>OR</b> Relaps* <b>OR</b> Reduc* <b>OR</b> Wors*                                                                                                                                                                                         | n/a                                                                                                                |
| 3   | Attain* <b>OR</b> Retention <b>OR</b> Retain* <b>OR</b> Increas*                                                                                                                                                                                                                                                                                                                                                                                                                       | n/a                                                                                                                |
| 4   | Refresh* <b>OR</b> Retrain* <b>OR</b> Boost <b>OR</b> Update <b>OR</b> Renew <b>OR</b> Revise <b>OR</b> Reteach* <b>OR</b> Redo                                                                                                                                                                                                                                                                                                                                                        | n/a                                                                                                                |

To create search:

1. Combine Keyword [TIAB] and MeSH terms for each row using **OR**, and encapsulate in brackets ()
2. Combine rows 2, 3 and 4 using **OR**
3. Combine this search result with row 1 using **AND**
4. Apply limits

**Limits: None**

## Appendix 2: SR1 – Title Screening Form

### Tackling skill decay following Basic Life Support training – a systematic review

|                                                                                                                                                      |                                                                                    |
|------------------------------------------------------------------------------------------------------------------------------------------------------|------------------------------------------------------------------------------------|
| <b>Date of screening</b>                                                                                                                             |                                                                                    |
| <b>Reviewer</b>                                                                                                                                      | Electronic form will have dropdown list of reviewer names                          |
| <b>Study details</b><br>Title, URL, citation                                                                                                         |                                                                                    |
| <b>Any conflicts of interest identified by the reviewer?</b><br>Eg. Were they involved in the publication?                                           |                                                                                    |
| <b>Does the study title suggest it may meet the INCLUSION criteria:</b>                                                                              | Involves individuals who have received BLS training: <u>Y/N</u>                    |
|                                                                                                                                                      | Assesses BLS skill retention via any means: <u>Y/N</u>                             |
| <b>English language copy available?</b>                                                                                                              | Yes                                                                                |
|                                                                                                                                                      | No – refer to project supervisor to assess if commissioned translation is feasible |
| <b>Comments / other information:</b>                                                                                                                 |                                                                                    |
| <b>Decision:</b><br>(at this stage, only <u>exclude</u> reports which do not meet the inclusion criteria. Quality of reports will be assessed later) | <b>Include / Exclude</b>                                                           |

## Appendix 3: SR2 – Abstract Screening Form

### Tackling skill decay following Basic Life Support training – a systematic review

|                                                                                                                                                      |                                                                                    |
|------------------------------------------------------------------------------------------------------------------------------------------------------|------------------------------------------------------------------------------------|
| <b>Date of screening</b>                                                                                                                             |                                                                                    |
| <b>Reviewer</b>                                                                                                                                      | Electronic form will have dropdown list of reviewer names                          |
| <b>Study details</b><br>Title, URL, citation                                                                                                         |                                                                                    |
| <b>Any conflicts of interest identified by the reviewer?</b><br>Eg. Were they involved in the publication?                                           |                                                                                    |
| <b>Does the study abstract suggest it may meet the INCLUSION criteria:</b>                                                                           | Involves individuals who have received BLS training: <u>Y/N</u>                    |
|                                                                                                                                                      | Assesses BLS skill retention via any means: <u>Y/N</u>                             |
| <b>English language copy available?</b>                                                                                                              | Yes                                                                                |
|                                                                                                                                                      | No – refer to project supervisor to assess if commissioned translation is feasible |
| <b>Comments / other information:</b>                                                                                                                 |                                                                                    |
| <b>Decision:</b><br>(at this stage, only <u>exclude</u> reports which do not meet the inclusion criteria. Quality of reports will be assessed later) | <b>Include / Exclude</b>                                                           |

## Appendix 4: SR3 – Full-text Screening & Data Extraction Form

### Tackling skill decay following Basic Life Support training – a systematic review

#### 1. Full-text screening

|                                                                                                                                                                                                                                         |                                                                 |
|-----------------------------------------------------------------------------------------------------------------------------------------------------------------------------------------------------------------------------------------|-----------------------------------------------------------------|
| <b>Date of screening</b>                                                                                                                                                                                                                |                                                                 |
| <b>Reviewer</b>                                                                                                                                                                                                                         | Electronic form will have dropdown list of reviewer names       |
| <b>Study details</b><br>Title, URL, citation                                                                                                                                                                                            |                                                                 |
| <b>Any conflicts of interest identified by the reviewer?</b><br>Eg. Were they involved in the publication?                                                                                                                              |                                                                 |
| <b>Does full-text review of the study indicate it meets the INCLUSION criteria:</b>                                                                                                                                                     | Involves individuals who have received BLS training: <u>Y/N</u> |
|                                                                                                                                                                                                                                         | Assesses BLS skill retention via any means: <u>Y/N</u>          |
| <b>Comments / other information:</b>                                                                                                                                                                                                    |                                                                 |
| <b>Decision:</b><br>At this stage, only <u>exclude</u> reports which obviously do not meet the inclusion criteria. Quality of reports will be assessed later.<br><br>If excluding, do not complete data extraction section (to follow). | <b>Include / Exclude</b>                                        |

## 2. Quality of study assessment

|                                                                                                                                                                                                               |                                                                                                            |
|---------------------------------------------------------------------------------------------------------------------------------------------------------------------------------------------------------------|------------------------------------------------------------------------------------------------------------|
| Complete relevant CASP checklist for study type <a href="https://casp-uk.net/casp-tools-checklists/">https://casp-uk.net/casp-tools-checklists/</a>                                                           | Copy/paste questions and responses                                                                         |
| RCT – complete Cochrane ‘Risk of Bias’ tool <a href="https://www.riskofbias.info/welcome/rob-2-0-tool/current-version-of-rob-2">https://www.riskofbias.info/welcome/rob-2-0-tool/current-version-of-rob-2</a> | Copy/paste questions and responses                                                                         |
| Assess risk of bias, based on CASP checklist +/- Cochrane tool                                                                                                                                                | Low / high                                                                                                 |
| Is there methodological flaw so severe that the study should be omitted from review?                                                                                                                          | Yes, omit / No, do not omit – studies flagged for omission at this stage will be referred to senior review |

**3. Data extraction****a. Background**

|                                                              |  |
|--------------------------------------------------------------|--|
| <b>Study Title</b>                                           |  |
| <b>Study Reference (Vancouver)</b>                           |  |
| <b>Country where study conducted</b><br>List all if multiple |  |

**b. Methods**

|                                                                                                         |                                     |
|---------------------------------------------------------------------------------------------------------|-------------------------------------|
| <b>Study design</b>                                                                                     | Randomised Control Trial            |
|                                                                                                         | Non-randomised interventional trial |
|                                                                                                         | Observational (cohort/case-control) |
|                                                                                                         | Commentary/Qualitative study        |
|                                                                                                         | Systematic review                   |
|                                                                                                         | Literature/Narrative review         |
|                                                                                                         | Other                               |
| <b>Population</b><br>Identify Key characteristics of the population studied                             |                                     |
| <b>Intervention(s)</b><br>If applicable – i.e. was refresher training delivered?                        |                                     |
| <b>Comparator</b><br>If applicable                                                                      |                                     |
| <b>Outcome measures used</b><br>I.e. what did the authors state as the primary, and secondary outcomes? |                                     |
| <b>Study inclusion criteria</b>                                                                         |                                     |
| <b>Study exclusion criteria</b>                                                                         |                                     |
| <b>Study duration</b>                                                                                   |                                     |
| <b>Number of participants</b>                                                                           |                                     |
| <b>Details of initial BLS training</b>                                                                  |                                     |
| <b>Time elapsed between initial BLS training and assessment of retention</b>                            |                                     |
| <b>Was any retraining received by participants not as part of this study?</b>                           |                                     |

|                                                         |  |
|---------------------------------------------------------|--|
| Eg. As part of routine education, re-certification etc. |  |
|---------------------------------------------------------|--|

c. For studies where refresher training was delivered:

|                                                                                                          |                                    |
|----------------------------------------------------------------------------------------------------------|------------------------------------|
| <b>Was there a comparator?</b><br>Eg. Placebo, another type of refresher training?                       |                                    |
| <b>If there was a comparator, how was allocation to groups conducted?</b>                                | <b>Randomised / non-randomised</b> |
| <b>If randomised, how was this done?</b>                                                                 |                                    |
| <b>Number of study arms</b><br>Eg. If just one form of refresher training vs comparator, this is 2 arms. |                                    |

d. Participant information

|                                                                                                                                                                      |  |
|----------------------------------------------------------------------------------------------------------------------------------------------------------------------|--|
| <b>Average age</b><br>Specify statistic – mean / median                                                                                                              |  |
| <b>Sex breakdown</b><br>Specify % male, % female                                                                                                                     |  |
| <b>Loss to follow up (n, %)</b>                                                                                                                                      |  |
| <b>Differences at baseline</b><br>Summarise any differences between the studied groups at baseline, before any measurement or intervention took place (if reported). |  |
| <b>Method(s) of recruitment to study</b><br>Describe / state                                                                                                         |  |
| <b>Other characteristics</b><br>lay-people/healthcare workers, previous BLS experience etc                                                                           |  |

e. Participant groups and their outcomes - complete one copy of table e. for each group if multiple interventions. Also complete a copy for the control / comparator group

|                                                                                                                                                     |                                                                                                                                                                                                                         |
|-----------------------------------------------------------------------------------------------------------------------------------------------------|-------------------------------------------------------------------------------------------------------------------------------------------------------------------------------------------------------------------------|
| <b>Group name</b>                                                                                                                                   |                                                                                                                                                                                                                         |
| <b>Description of group, including intervention</b><br>What was done differently to this group than other participants?                             |                                                                                                                                                                                                                         |
| <b>Number (%) allocated to group</b>                                                                                                                |                                                                                                                                                                                                                         |
| <b>Method of BLS re-assessment</b><br>Include any information concerning training of BLS assessors                                                  |                                                                                                                                                                                                                         |
| <b>Time between training and re-assessment</b>                                                                                                      |                                                                                                                                                                                                                         |
| <b>Outcomes:</b> where possible use raw numbers in the following format: n(%)                                                                       | <b>CPR rate</b><br><b>CPR depth</b><br><b>CPR hand position</b><br><b>CPR hands-off time</b><br><b>Rescue breath success</b><br><b>BLS algorithm completeness</b><br><b>BLS summative assessment – ‘pass’ or ‘fail’</b> |
| <b>Other outcomes</b><br>Give details of other outcome measures reported in the study. Where possible use raw numbers in the following format: n(%) |                                                                                                                                                                                                                         |
